# Supplementary material for: Prospects for dendroanatomy in paleoclimatology – a case study on Picea engelmannii from the Canadian Rockies
Source: Copernicus journal article supplement (doi:10.5194/cp-2021-190), 2022-01-11
Supplement: Supplementary file [file cp-2021-190-AC1-supplement.pdf]

## Reply on RC1

This manuscript investigates the potential of dendroanatomical features of high-elevation Engelmann spruce from the Canadian Rockies as paleoclimate proxies. In doing so, the authors develop the longest dendroanatomical dataset for North America. I feel this study very interesting as it not only provides a comprehensive assessment of a relatively new tree-ring proxy type, dendroanatomy, but also attempts to compare dendroanatomical parameters with those obtained using the existing techniques - X-ray densitometry and blue intensity. I also appreciate that the authors test for the resolution related biases in BI and X-ray density and use two climate datasets to avoid biased results. This study finds that maximum radial cell wall thickness and anatomical MXD are the two most robust proxies of summer temperature and may be superior to MXBI and even X-ray MXD, where the latter has long been recognized as the most temperature-sensitive tree-ring proxy. These promising results will encourage dendroclimatologists to use anatomical parameters to better understand regional and large-scale climate history spanning centuries to millennia.

Overall, this study is valuable, although there are a couple of weak parts, that are outlined below.

*We thank the referee for acknowledging the importance of our work, and also for the time and effort that she/he have put into thoroughly assessing our manuscript. We have taken the opportunity to revise our work following this helpful suggestions. Provided below is a detailed description of how we have incorporated the requests and suggestions (shown in blue italics). We also provide a version of the manuscript where all changes are tracked.*

### Major comments:

My primary comments are about the long-term trend analysis in section 3.3. In dendroclimatology, it is widely accepted that many tree-ring parameters, even including dendroanatomical ones (see fig. S7 of Björklund et al., 2020), exhibit age effects which may mask true low-frequency climate variability embedded in tree-ring data. Thus, detrending is fundamental to remove these non-climatic, long-term trends, while it may also be challenged in specific cases. Indeed, it may be difficult to disentangle the long-term climate and age signals in even-aged samples as is the case of this study. Here, the authors try to interpret long-term trends of different parameters based on non-detrended series. Though “a robust picture of long-term trends needs RCS-type detrending” is acknowledged on Lines 578–579, I still wonder whether the analysis of the long-term trend based on the non-detrended data (mixed with both age-related and climatic trends) is appropriate. Moreover, the use of instrumental temperatures here to compare with nondetrended tree-ring data is confusing as non-detrended tree-ring data contain more information than climate.

While the authors’ analysis on the “high-pass” time series is good enough (not necessary to change), I would suggest using the detrended dataset for discussing the long-term trends (Lines 578–600), unless reasons and meanings of not using detrending could be sufficiently justified in the manuscript. The signal-free approach (Melvin and Briffa 2008) may be efficient to preserve more low-frequency climate signals. If the signal-free regional curve standardization does not lead to success due to low replication, signal-free approach plus age-dependent spline would likely be useful (see Wilson et al., 2019, Heeter et al., 2020, Wang et al., 2020). I also think even if these detrending methods may result in problematic long-term trends, it is still useful to present/discuss these chronologies rather than the non-detrended series. At least this will show that some tree-ring parameters are likely facing issues of retaining low-frequency signals, and further studies are thus needed. It might be useful to plot the age-related trend of each tree series for each parameter similar to (if necessary, replace) Figure 9, when discussing the success or failure of using these detrending methods. In addition, the reconstruction of Luckman and Wilson (2004) might be used as a reference to assess the long-term trends of detrended chronologies.

*We thank the referee for this important remark. We agree that dendroanatomical data may too be subjected to age-related trends (as shown by Björklund et al., 2020) and also suggested by the results of this study (see e.g., fig. S4 where aMXD and Max. radial CWT clearly reveal contrasting trends). With that said, we do not agree that the use signal-free approach is appropriate in this context. Our study is based entirely on living trees, which means that they very likely share a climate signal at lower frequencies even if they are aligned by cambial age (i.e. trend in signal). This means that any attempt, even using signal-free approaches, will provide indices that likely have to be revised when implementing the same technique on a large multi-generational material (ongoing work). By providing such indices the current study would suggest certainty where there is little, leaving the readers misled and confused when the long-term trends will have to be revised in the next ms presenting the full 1000y dataset. We have now added text to sect 2.2 to clarify this point and argue for not using RCS or the signal free approach in this first ms. We have also followed the suggestion made by the referee and removed the comparison between instrumental temperature and nondetrended tree-ring data from fig 6, and also removed sect. 3.3 (previous version of the ms) discussing the long-term trends in the dataset.*

**Additional comments:**

Line 32: Long-term secular trends, please refer to the major comments. *See our previous response.*

Line 49: It is better to specify what are the “important climate periods”. *Clarified (we here refer to the MCA and LIA).*

Lines 70–71: Perhaps also add Björklund et al., 2020 (see the recommended references in the end). *Added.*

Line 80: should use “has become”... *corrected.*

Lines 97–102: Try to merge the two sentences. The second sentence is quite similar to the latter half of the first sentence. *Merged.*

Lines 104–105: Avoid saying that 15 trees are well-replicated. A well-replicated dataset may refer to a collection of hundreds of trees. *Sentence rephrased.*

Line 109: X-ray radiography is not a new technique and Dendro2003 is a system designed about 20 years ago. There are now many advancing techniques providing higher resolution density data, such as computed tomography (see Van den Bulcke et al., 2019). “the state-of-art” here should be removed. *We have followed the reviewers remark and removed the “state-of-the-art” here and elsewhere in the ms. However, we would still like to point out that although the Walesch system is arguably 30-40 years in the making it is still the state-of- the art in terms of data quality, homogeneity and resolution. We acknowledge that there are other more advanced systems around but they are not superior in data quality (see Björklund et al., 2019). Neither have these techniques yet generated sufficient amount of data for them to be tested and evaluated on a broader scale.*

Line 114: Be careful, en dash (–) should be used to represent the range in all cases, rather hyphen (-). Please check throughout the manuscript. *Checked and corrected.*

Line 115: What is the meaning of “pivotal locations” here? I think every location lacking a good proxy record can be pivotal for paleoclimatology. Consider removing “pivotal”. *Removed.*

Line 133: Try to move the arrow a little to indicate the correct location. A bit misleading here. *The arrow is now removed from fig 1, and the caption is re-worded.*

Line 136: Athabasca Glaciers is not indicated in Figure 1A). Please try to indicate it on the map, or remove the “Athabasca Glaciers” in the figure caption. *Removed.*

Line 145: It is better to use “immersed” instead of “washed”.  
*Changed to "refluxed". We used a Soxlet setup, where alcohol was circulating. "Immersed" is therefore in our opinion not the right word to describe the method.*

Line 158: The averaged cell wall thickness is not discussed in the manuscript. It is not necessary to keep it here. CWT should be moved to Line 157. *Average cell wall thickness is not discussed in the ms, yet it is used to derive other parameters. For every cell the average CWT is computed. To get aMXD the ratio between average CWT and total cell area is computed. For each 20 micrometer wide band, the 75<sup>th</sup> percentile of these values are selected to get a profile across the ring. The maximum value of the profile is then selected to get the aMXD value of that year.*

Lines 159–161: What is the tangential width of the measurement window? The 75th percentile of what values? Are only the 75th percentile values used or 0–75 percentile used? Please specify. In addition, by delimiting the 20 um bands some tracheids would be separated into different bands, I wonder how the CWT was obtained? It seems hard to measure “two radial and two tangential cell walls per tracheid cell” if tracheids are separated. Perhaps more details are needed so that the experiment could be repeated. *This section has been expanded to clarify the methodological questions raised by the referee.*

Line 179: Should indicate the version of CooRecorder. *Info added – ver. 8.1. We note however that the program version do not matter in this context, since the MXBI measurements are not affected by the program version.*

Line 197: Figure S3 is not mentioned anywhere in the manuscript. Perhaps need to refer to Figure S3 here and re-order the supplementary figures. *Done.*

Lines 204–205: The justification for not using RCS is not convincing enough. In my view, RCS works efficiently in cases where dead trees are also included, as it could avoid the “segment-length-curse”. If RCS does not work for the 15 living trees, the low sample replication and un-uniform growth patterns are more likely the reason. So, consider clarifying here that low replication hampers the use of RCS. I also suggest giving some supplementary graphics of RCS chronologies to explain why RCS is not suitable. In line with my major comments, it is worth trying signal-free RCS and signal-free age dependent spline smoothing as well. *See our previous response (under “major comments”).*

Lines 213–215: Is there a particular reason why the robust mean is not used here? Specify if possible. However, it is not a big problem. It is better to use “detrended data” (or “Spline smoothed data”, if a second detrending method is used; see major comments) in the manuscript because some medium-frequency signals may still be retained by using the 35-yr spline smoothing. “High-pass filtered data” sounds like all low frequencies are filtered out. *Done, changed from “high-pass filtered” to “detrended data” according to suggestion.*

Lines 220–221: Please avoid writing “sufficient sample depth” here. The minimum sample depth is only 9, which even doesn’t lead to an EPS>0.85 for many parameters according to Table 1. *Removed and rephrased.*

Line 229: Caution, the term “cross-correlation” is wrongly used in this manuscript. Generally, in statistics, the term “cross-correlation” represents the lagged correlations between time series, rather than correlations across time series. “Pairwise correlation”

should be used in the entire manuscript.

*We appreciate this clarification, we have now changed to "pairwise correlation", both here and throughout the rest of the manuscript.*

Line 241: The correct citation should be "St. George and Luckman (2001)". Change it also in the reference list. *Corrected.*

Line 245: Citation or URL of Meteorological Service of Canada should be added. In addition, I couldn't find the gridded data spanning 1895–present from the Meteorological Service of Canada. Where the data could be accessed? *Citation added.*

Line 264: What is the time period used to calculate the  $\bar{r}$  and EPS? The period 1585–2014 here is not consistent with Line 219 which describes 1700–1994 is used for the subsequent analysis. Please be consistent. *This is now clarified both in the results section and in the table 1 caption. All the statistics in table 1 have been computed over the common 1700–1994 period.*

Line 266: If there is only one study cited here, the sentence should be: "with a previous study..." *Corrected.*

Line 272 and Table 1: How the  $n$  for  $EPS = 0.85$  (the last column of Table 1) is estimated? Some  $n$  is even greater than the actual number of samples. I guess " $n$  for  $EPS = 0.85$ " is calculated based on the  $\bar{r}$  and the equation of EPS. Please clarify this somewhere perhaps with an equation, e.g., at the bottom of Table 1. *Yes, the estimation is based on the  $\bar{r}$  statistics for each tree-ring parameter and the equation of the EPS. This is now clarified in the table caption.*

Lines 301 and 414: See the comment for Line 229. *Corrected.*

Lines 336–337: Should use "The first two components together represent 68.1% of the total variation". Should also clarify what correlation is used, Pearson's  $r$ ? *rephrased and clarified.*

Lines 339, 390, and 418: see the comment for Lines 213–215. *Changed to "detrended data", here and throughout the manuscript.*

Lines 364–366: Perhaps also useful to compare the seasonal responsive window with Picea species in the North American continent. For example, black spruce in the eastern North American boreal forest, in similar latitudes. *We thank the reviewer for this suggestion. We have now added a short comparison of our results with the recent (2020) study by Wang et al. on black spruce from eastern Canada.*

Line 391: "Monthly or seasonally averaged temperature". *sentence re-phrased (also taking into account the suggestion made by referee 2)*

Lines 411–413. Besides the low measurement resolution, the color sensitivity of the BI method may also affect the signal strength of MXBI to some extent. It is hard to ensure that all the measured wood cores are completely free of color biases. It is thus highly appreciated to use a few sentences somewhere to illustrate that weaker signal strength may also result from the color sensitivity of MXBI even for unstained living trees, see Wang et al., 2020. This is a fair discussion about the BI method. *We understand the concern raised by the reviewer, and the MXBI discoloration issue is already mentioned in our work (lines 613–622). Sample discoloration, however, has a gradual effect on the MXBI chronology, often manifesting as a long-term trend. Here, the data has been detrended with a 35-y spline, which should remove the effect of sample discoloration.*

Line 430: consider referring to Figure S3 after “in the widest rings”. *Done*

Line 439:  $r^2$  should be used instead of  $r^2$ . Sometimes  $R^2$  is also used in the manuscript. Please keep the expression consistent. *Changed.*

Lines 485–487: Consider simplifying the sentence: “were further assessed by a split period calibration procedure (1901–1948 and 1949–1994)”. *Changed accordingly.*

Lines 488–489: Refer to the major comments. *See our previous reply. Figure 5 has been modified to display the results only for the detrended data.*

Lines 513: Since the  $r^2$  distribution consists of 1000 values, it is better and more logical to perform some statistical test (e.g., two-sided student’s  $t$ ) to show whether correlations of different parameters are similar or not. *We thank the referee for this suggestion. We have now performed a two-sample  $t$ -test to whether there is a significant difference in calibration statistics between parameters.*

Line 516: Figures 7–9 were mentioned only once each in the main manuscript. Maybe should consider moving them to the supplementary material. In addition, “correlated width” should be changed to “correlated with”. *Figure 9 moved to the supplement according to suggestion. Figures 7 and 8 are however kept in the ms as these are important for the discussion.*

Line 530, figure 6: the top-left annotations appear not complete. Only Max. radial CWT in A) and only aMXD in B)? Since aMXD and X-ray MXD are more directly comparable, why they are plotted in two separate plots? Perhaps show chronologies using either signal-free RCS or signal-free age-dependent spline here, after the major comments are taken into account. *The plots in fig 6 (now fig. 5) are now changed to display detrended data (standardized using a 35-year spline). We have also removed all information from the plots based on non-detrended mean chronologies. aMXD and x-ray MXD are now shown in the same panel.*

Lines 550–611: please refer to the major comments. *See our previous response concerning the detrending issue.*

Line 560: Should use “lower frequencies”. *Changed*

Line 625, Figure 9: Why JJA temperature is used here? Ring width contains JJ signal and density parameters contain JA signal. *Figure moved to supplement. JJA is used here as it encompasses the signal of both RW and the density parameters.*

Line 655: Please remove “the state-of-art”. *Removed. However, see our previous comment.*

The reference list: check the format on Lines 729–731; Line 745: “IAWA J”; Line 755: “Science”; Line 795: remove “Verona”; check Lines 804–806; Are Lines 829, 832, and 870 necessary? Line 864: volume and page numbers should be added. *We thank the reviewer for taking time and checking the reference list. The format issues are now corrected (except for Ln 864, where volume and page no are not available).*

References cited in this review:

Björklund et al., 2020. Dendroclimatic potential of dendroanatomy in temperaturesensitive *Pinus sylvestris*.

Heeter et al., 2020. Late summer temperature variability for the Southern Rocky Mountains (USA) since 1735 CE: applying blue light intensity to low-latitude *Picea engelmannii* Parry ex Engelm

Luckman and Wilson, 2004. Summer temperatures in the Canadian Rockies during the last millennium: a revised record.

Melvin and Briffa, 2008. A “signal-free” approach to dendroclimatic standardization.

Van den Bulcke et al., 2019. Advanced X-ray CT scanning can boost tree ring research for earth system sciences.

Wang et al., 2020. Temperature sensitivity of blue intensity, maximum latewood density, and ring width data of living black spruce trees in the eastern Canadian taiga.

Wilson et al., 2019. Improved dendroclimatic calibration using blue intensity in the southern Yukon.

*Thanks for this clarification.*
